# Supplementary material for: Insights into the RNA binding mechanism of human L1-ORF1p: a molecular dynamics study
Source: Royal Society of Chemistry journal article supplement (doi:10.1039/c7mb00358g), 2017-07-05

**Supplementary Table S1.** Binding energy and its components for ORF1p in complex with PolyU, PolyA and L1RNA

| <b>Energy Component (kCal)</b>                                  | <b>PolyU</b>   | <b>PolyA</b>   | <b>L1RNA</b>   |
|-----------------------------------------------------------------|----------------|----------------|----------------|
| $\Delta E_{\text{vdW}}$                                         | -363.82        | -361.33        | -378.25        |
| $\Delta E_{\text{elec}}$                                        | -3201.45       | -3289.11       | -3250.78       |
| $\Delta E_{\text{pb}}$                                          | 3054.83        | 3144           | 3114.25        |
| $E_{\text{npolar}}$                                             | -258.11        | -255.32        | -260.31        |
| $\Delta E_{\text{elec}} + \Delta E_{\text{pb}}$                 | -146.62        | -145.11        | -136.53        |
| $\Delta E_{\text{vdW}} + E_{\text{npolar}} + E_{\text{disper}}$ | -94.37         | -84.72         | -105.02        |
| $E_{\text{disper}}$                                             | 527.56         | 531.91         | 533.54         |
| $\Delta G_{\text{gas}}$                                         | -3565.28       | -3650.44       | -3629.04       |
| $\Delta G_{\text{solv}}$                                        | 3324.27        | 3420.68        | 3387.47        |
| <b>TOTAL (<math>\Delta G_{\text{bind}}</math>)</b>              | <b>-241.01</b> | <b>-229.76</b> | <b>-241.56</b> |

**Supplementary Table S2.** List of ORF1p residues involved in contacts with RNA.

|                     | <b>PolyU</b>                                                                                                                                                    | <b>PolyA</b>                                                                                                                                                            | <b>L1RNA</b>                                                                                                                                                                                      |
|---------------------|-----------------------------------------------------------------------------------------------------------------------------------------------------------------|-------------------------------------------------------------------------------------------------------------------------------------------------------------------------|---------------------------------------------------------------------------------------------------------------------------------------------------------------------------------------------------|
| <b>CC</b>           | Glu136, Lys137,<br>Lys140                                                                                                                                       |                                                                                                                                                                         | Lys137, Arg141                                                                                                                                                                                    |
| <b>RRM</b>          | Arg159, Hie216,<br>Arg232, Arg235,<br>Arg248, Thr250,<br>Arg248', Leu249',<br>Val251', Arg159'',<br>His216'', Arg248'',<br>Thr250''                             | Hie216, Arg235,<br>Gly238, Arg248,<br>Arg159', Leu231',<br>Arg235', Arg248',<br>Thr250'                                                                                 | Arg159, Hie216,<br>Arg235, Arg248,<br>Thr250, Arg159',<br>Arg235', Arg248',<br>Arg159''                                                                                                           |
| <b>RRM<br/>Loop</b> | Arg206, Tyr207,<br>Ser208, Ser209,<br>Ala212, Thr213,<br>Thr203', Gln205',<br>Arg206', Thr203'',<br>Tyr207'', Arg210'',<br>Arg211''                             | Arg206, Tyr207,<br>Ser209, Arg211,<br>Gln205', Arg206',<br>Arg210'', Arg211''                                                                                           | Arg206', Tyr207,<br>Ser208, Ser208',<br>Ser209', Arg210',<br>Arg210'', Ala212'',                                                                                                                  |
| <b>CTD</b>          | Arg261, Arg279,<br>Pro278, Arg261',<br>Arg279', Ser281',<br>Tyr282', Lys285',<br>Arg248'', Thr250'',<br>Arg261'', Arg262'',<br>Lys 300'', Gln301'',<br>Asn322'' | Arg262, Gly265,<br>Gln277, Arg279,<br>Ser287, Arg261',<br>Arg279', Ser281',<br>Tyr282', Lys285',<br>Arg261'',<br>Arg262'',<br>Gln301'', Lys318'',<br>Asn322'', Met323'' | Leu258, Arg261,<br>Arg262, Gly265,<br>Pro278, Arg279,<br>Tyr296, Arg261',<br>Arg262', Ile280',<br>Ser281', Tyr282',<br>Ser287', Tyr296',<br>Ile298', Arg261'',<br>Gln301'',<br>Arg304'', Asn322'' |

**Supplementary Table S3.** Stacking interactions of RNA nucleotides

|                                                | <b>PolyU</b>                                                                                                                      | <b>PolyA</b>                                                                                             | <b>L1RNA</b>                                                                                                                         |
|------------------------------------------------|-----------------------------------------------------------------------------------------------------------------------------------|----------------------------------------------------------------------------------------------------------|--------------------------------------------------------------------------------------------------------------------------------------|
| <b>Bases involved in stacking interactions</b> | UU: U9, U10<br>UU: U11, U12<br>UU: U14, U15<br>UUU: U18, U19, U20<br>UU: U21, U22<br>UU: U24, U25<br>UU: U26, U27<br>UU: U28, U29 | AAAA: A2, A3, A4, A5<br>AA: A7, A8<br>AA: A10, A11<br>AA: A14, A15<br>AA: A16, A17<br>AAA: A18, A19, A20 | UG: U4, G5,<br>CAC: C6, A7, C8<br>UG: U11, G12<br>UG: U13, G14<br>ACA: A16, C17, A18<br>AA: A21, A22<br>AA: A23, A24<br>AA: A26, A27 |
| <b>Bases not in stacking interactions</b>      | U1, U2, U3, U4,U5,<br>U6,U7,U8, U16, U17,<br>U23,                                                                                 | A1, A6, A9, A12, A13,<br>A21, A22, A24, A25,<br>A26, A27, A29                                            | A1, C2, C3, A9, U19,<br>A25, A28, A29                                                                                                |

**Supplementary Table S4.** H-bond interactions formed between ORF1p and polyU, polyA and L1RNA

| Domain             | Acceptor | Donor      | Average Distance | Average Angle | % occupied |
|--------------------|----------|------------|------------------|---------------|------------|
| <b>ORF1p-L1RNA</b> |          |            |                  |               |            |
| <b>Chain A</b>     |          |            |                  |               |            |
| <b>CC</b>          | RC3O2    | LYS137NZ   | 3.0477           | 156.3813      | 14.49      |
|                    | RC3O3'   | ARG141NH2  | 2.9438           | 157.5585      | 18.47      |
|                    | RU4OP1   | ARG141NH1  | 2.8692           | 162.4909      | 19.46      |
| <b>RRM</b>         | RA23O3'  | ARG159NH1  | 3.0457           | 151.1567      | 25.02      |
|                    | RA24OP2  | ARG159NH2  | 2.8018           | 159.4062      | 33.72      |
|                    | RA25OP1  | ARG159NH1  | 2.8677           | 153.8342      | 21.53      |
|                    | RA21OP2  | TYR207OH   | 2.7364           | 162.4674      | 22.5       |
|                    | RG20OP2  | SER208N    | 2.9653           | 158.316       | 46.12      |
|                    | RA23O2'  | HIE216NE2  | 2.955            | 156.0266      | 41.69      |
|                    | RA26OP2  | ARG235NH1  | 2.8072           | 156.9597      | 21.71      |
|                    | RA25OP2  | ARG248NH1  | 2.8304           | 153.1822      | 38.45      |
|                    | RA25OP2  | THR250OG1  | 2.7217           | 163.6506      | 24.63      |
| <b>CTD</b>         | LEU258O  | RA25N6     | 2.9331           | 157.7639      | 17.62      |
|                    | ARG262O  | RA25N6     | 3.0691           | 159.8322      | 44.84      |
|                    | GLY265O  | RA27N6     | 3.0652           | 153.74        | 34.53      |
|                    | PRO278O  | RA28N6     | 2.9746           | 153.8729      | 30.77      |
|                    | RA26OP1  | ARG261NH2  | 2.8571           | 150.9416      | 29.98      |
|                    | RA24OP2  | ARG262NH2  | 2.881            | 159.5111      | 20.13      |
|                    | RA25OP1  | ARG262NH2  | 2.8501           | 157.8495      | 23.93      |
|                    | RA28OP1  | ARG279NH1  | 2.8176           | 158.48        | 21.62      |
|                    | RA29OP1  | ARG279NH1  | 2.8357           | 151.8966      | 22.41      |
|                    | RA29N7   | TYR296OH   | 2.8558           | 161.1295      | 16.45      |
| <b>Chain B</b>     |          |            |                  |               |            |
| <b>RRM</b>         | RC15OP2  | ARG159`NH2 | 2.9054           | 156.5966      | 16.89      |
|                    | RA10OP1  | ARG206`NH1 | 2.8692           | 158.7042      | 15.39      |
|                    | RA10N1   | SER208`OG  | 2.903            | 157.2779      | 30.91      |
|                    | SER209`O | RU11N3     | 3.0276           | 155.5941      | 34.91      |
|                    | SER209`O | RG12N2     | 2.9415           | 148.964       | 69.76      |
|                    | RG12O6   | ARG210`NE  | 2.92             | 152.7713      | 51.51      |
|                    | RA18OP2  | ARG235`NH1 | 2.8977           | 157.6642      | 27.43      |
|                    | RA16OP1  | ARG248`NH1 | 2.8634           | 158.3098      | 17.69      |
| <b>CTD</b>         | RG14OP2  | ARG261`NH1 | 2.8156           | 159.1321      | 29.94      |
|                    | RC15OP1  | ARG261`NH1 | 2.7952           | 154.4307      | 95.76      |
|                    | RA16OP2  | ARG261`NH2 | 2.9037           | 155.111       | 21.48      |
|                    | RU13OP2  | ARG262`NH2 | 2.8216           | 159.518       | 85.94      |

|     |                    |             |        |          |          |
|-----|--------------------|-------------|--------|----------|----------|
|     | RG14OP2            | ARG262`NH2  | 2.8089 | 162.1619 | 48.42    |
|     | RA16O2'            | SER281`OG   | 2.8722 | 160.6361 | 19.44    |
|     | RC17OP1            | SER281`OG   | 2.6824 | 164.2244 | 38.5     |
|     | RA18N7             | SER281`OG   | 2.8674 | 160.8802 | 17.34    |
|     | RA16OP2            | TYR282`N    | 2.9627 | 149.5644 | 21.2     |
|     | RU19OP1            | TYR296`OH   | 2.7515 | 165.8574 | 20.15    |
|     | TYR296`O           | RG20N1      | 2.9072 | 160.4661 | 61.59    |
|     | RG20O6             | ILE298`N    | 2.9725 | 156.4357 | 24       |
|     | ILE280`O           | RC15O2'     | 2.782  | 155.7054 | 19.33    |
|     | SER287`OG          | RA18N6      | 3.1572 | 151.4591 | 24.01    |
|     | <b>Chain C</b>     |             |        |          |          |
| RRM | RC8O2              | ARG159``NH2 | 2.9036 | 153.9673 | 21.31    |
|     | RU4OP2             | ARG210``NH2 | 2.9925 | 151.1986 | 37.19    |
|     | RG5OP1             | ARG210``NE  | 2.9017 | 149.7324 | 90.19    |
|     | RC6O2              | ALA212``N   | 3.038  | 159.2213 | 64.53    |
| CTD | RA7OP1             | ARG261``NH2 | 2.8386 | 160.5138 | 55.8     |
|     | RC8OP2             | ARG261``NH1 | 2.8428 | 156.8251 | 34.64    |
|     | A1N7               | GLN301``NE2 | 3.0014 | 154.5337 | 21.28    |
|     | GLN301``OE1        | RA1N6       | 2.9723 | 151.4112 | 18.22    |
|     | RC3N3              | GLN301``NE2 | 3.0935 | 160.1393 | 21.86    |
|     | RC3N3              | ARG304``NH1 | 2.9836 | 157.8729 | 30.78    |
|     | RU4O4              | ARG304``NH2 | 2.8916 | 153.3902 | 50.62    |
|     | RG5O6              | ARG304``NH2 | 2.9176 | 146.0391 | 21.35    |
|     | <b>ORF1p-PolyU</b> |             |        |          |          |
|     | <b>Chain A</b>     |             |        |          |          |
| CC  | GLU136OE2          | RU1O2'      | 2.7152 | 162.8721 | 37.68    |
|     | RU2O2              | LYS137NZ    | 2.8339 | 159.9846 | 34.02    |
|     | RU3O2P             | LYS137NZ    | 2.8176 | 157.4198 | 32.58    |
| RRM | RU23O2P            | ARG159NH1   | 2.8245 | 156.7635 | 22.02286 |
|     | RU17O3'            | ARG206NE    | 3.1077 | 146.0405 | 41.22286 |
|     | RU18O2P            | ARG206NH2   | 2.8191 | 153.8926 | 85.73143 |
|     | RU19O2P            | ARG206N     | 2.8053 | 156.8401 | 98.32571 |
|     | SER208OG           | RU19N3      | 2.9639 | 152.8092 | 47.15429 |
|     | RU21O2P            | TYR207OH    | 2.7303 | 160.352  | 76.80286 |
|     | RU18O2             | SER208OG    | 2.7945 | 160.3332 | 51.20571 |
|     | RU19O2             | SER208N     | 2.9481 | 158.1659 | 87.00571 |
|     | RU19O2             | SER209N     | 3.1455 | 149.58   | 31.10571 |
|     | RU21O2P            | SER209OG    | 2.6952 | 163.5843 | 25.08    |
|     | RU21O2             | ALA212N     | 2.9996 | 156.8082 | 15.00857 |
|     | RU21O2             | THR213OG1   | 2.8029 | 157.0456 | 19.13143 |
|     | RU22O3'            | HIE216NE2   | 3.0039 | 152.8105 | 36.27714 |

|                |             |             |        |          |          |
|----------------|-------------|-------------|--------|----------|----------|
|                | RU23O2P     | HIE216NE2   | 3.0236 | 153.5663 | 17.57714 |
|                | RU27O2P     | ARG232NH1   | 2.8615 | 158.1361 | 49.59143 |
|                | RU28O2P     | ARG232NH1   | 2.8321 | 154.637  | 66.07143 |
|                | RU27O2P     | ARG235NH2   | 2.8691 | 158.8198 | 42.03429 |
|                | RU29O2P     | ARG235NH1   | 2.81   | 161.3784 | 15.83714 |
|                | RU23O3'     | ARG248NH1   | 3.0082 | 153.1261 | 32.29429 |
|                | RU24O2P     | ARG248NH2   | 2.8065 | 158.055  | 43.41429 |
|                | RU24O2P     | THR250OG1   | 2.7387 | 161.2473 | 32.82571 |
| CTD            | PRO278O     | RU29O3'     | 2.7344 | 159.5447 | 58.14571 |
|                | RU25O2P     | ARG261NH1   | 2.8027 | 159.2595 | 85.18    |
|                | RU26O1P     | ARG261NH1   | 2.8515 | 151.5289 | 79.98571 |
|                | RU29O2      | ARG279NH1   | 2.8584 | 154.6315 | 66.65714 |
|                | ASP299OD1   | RU3N3       | 2.9601 | 160.6259 | 19.24571 |
| <b>Chain B</b> |             |             |        |          |          |
| RRM            | RU13O4      | THR203`OG1  | 2.8002 | 154.7925 | 34.42857 |
|                | RU12O4      | GLN205`N    | 3.0481 | 158.9996 | 22.71714 |
|                | RU12O2P     | ARG206`NH2  | 2.864  | 157.2744 | 47.12    |
|                | RU14O2      | ARG248`NH1  | 2.8712 | 157.9147 | 48.13714 |
|                | LEU249`O    | RU15N3      | 2.9875 | 159.321  | 72.32    |
|                | RU15O2      | VAL251`N    | 3.1068 | 150.8526 | 54.84    |
| CTD            | RU15O2P     | ARG261`NH1  | 2.8527 | 151.7637 | 20.11714 |
|                | RU16O3'     | ARG279`NH2  | 3.0706 | 156.6655 | 17.93143 |
|                | RU17O1P     | ARG279`NH1  | 2.8059 | 157.6578 | 24.79143 |
|                | RU16O1P     | SER281`OG   | 2.681  | 163.22   | 18.72571 |
|                | RU17O1P     | SER281`OG   | 2.7324 | 164.1652 | 49.09143 |
|                | RU16O1P     | TYR282`N    | 3.0163 | 155.9352 | 82.37143 |
|                | RU17O2P     | LYS285`NZ   | 2.7908 | 159.2008 | 35.14571 |
|                | RU18O1P     | LYS285`NZ   | 2.7795 | 158.0233 | 33.58286 |
| <b>Chain C</b> |             |             |        |          |          |
| CC             | ASP151``OD1 | RU10N3      | 2.9075 | 159.0425 | 36.11    |
|                | RU11O4      | ARG155``NH1 | 2.9311 | 152.5001 | 18.73143 |
| RRM            | RU6O3'      | ARG159``NH1 | 3.0736 | 152.3997 | 34.99429 |
|                | RU7O2P      | ARG159``NH1 | 2.9106 | 157.8031 | 42.81429 |
|                | GLU169``O   | RU27N3      | 2.9983 | 153.8385 | 29.73    |
|                | RU27O2'     | ASN170``ND2 | 3.0513 | 158.1058 | 18.04286 |
|                | THR203``O   | RU6N3       | 2.9735 | 162.8019 | 38.81    |
|                | RU26O4      | GLN205``NE2 | 2.9329 | 157.3378 | 35.42571 |
|                | RU27O4      | GLN205``NE2 | 2.9039 | 157.1326 | 18.10571 |
|                | RU5O2P      | TYR207``OH  | 2.7911 | 162.1916 | 15.34857 |
|                | RU6O4       | ARG210``N   | 2.8903 | 151.9667 | 17.34571 |
|                | RU6O4       | ARG211``N   | 2.9661 | 156.0868 | 33.68    |

|                |                    |             |           |          |          |
|----------------|--------------------|-------------|-----------|----------|----------|
|                | RU6O2'             | HIS216``NE2 | 2.9731    | 150.8876 | 16.95143 |
|                | RU7O4              | ARG248``NH1 | 2.9024    | 158.0005 | 26.47714 |
|                | RU7O2              | THR250``OG1 | 2.7753    | 160.4281 | 46.76857 |
| CTD            | RU8O2P             | ARG261``NH1 | 2.8233    | 156.6969 | 71.48571 |
|                | RU9O2P             | ARG261``NH1 | 2.8279    | 158.0209 | 78.23429 |
|                | RU5O4              | ARG262``NE  | 2.8767    | 157.2641 | 43.26571 |
|                | GLU263``OE1        | RU5N3       | 2.9571    | 162.5817 | 34.66    |
|                | RU3O2P             | LYS300``NZ  | 2.8254    | 152.0865 | 15.36857 |
|                | RU3O2P             | LYS300``NZ  | 2.8232    | 151.6734 | 15.3     |
|                | RU3O1P             | GLN301``NE2 | 2.8538    | 160.9611 | 50.98286 |
|                | RU4O2'             | ASN322``ND2 | 2.9819    | 156.5024 | 17.6     |
|                | <b>ORF1p-PolyA</b> |             |           |          |          |
| <b>Chain A</b> |                    |             |           |          |          |
| RRM            | RA23O1P            | ARG159NH2   | 2.823     | 158.4223 | 26.25    |
|                | RA20O1P            | ARG206NE    | 2.8438    | 155.8848 | 31.96    |
|                | RA20O2P            | TYR207N     | 3.0209    | 161.6726 | 27.17    |
|                | RA21O2P            | SER209OG    | 2.7238    | 163.2564 | 42.09    |
|                | RA21O2P            | ARG211NH2   | 2.8339    | 158.9828 | 44.8     |
|                | RA22O2P            | ARG211NH1   | 2.845     | 157.235  | 66.56    |
|                | RA23O1P            | HIE216NE2   | 2.9124    | 155.4849 | 28.53    |
|                | RA25O2P            | ARG235NH2   | 2.8514    | 157.1019 | 23.15    |
|                | GLY238O            | RA26N6      | 0.5413    | 2.9493   | 54.13    |
|                | RA23O2'            | ARG248NH1   | 2.9857    | 154.0875 | 15.3     |
|                | RA24O1P            | ARG248NH1   | 2.899     | 157.0797 | 25.14    |
|                | CTD                | RA25O1P     | ARG248NH1 | 2.8187   | 155.6813 |
| RA23O3'        |                    | ARG262NH2   | 2.9791    | 148.5868 | 17.07    |
| RA24O1P        |                    | ARG262NH2   | 2.8924    | 156.2581 | 16.5     |
| GLY265O        |                    | RA25N6      | 0.1942    | 3.1353   | 19.42    |
| GLN277O        |                    | RA28N6      | 0.1603    | 2.9836   | 16.03    |
| RA27O1P        |                    | ARG279NH2   | 2.9269    | 154.713  | 55.48    |
| RA28O2P        |                    | ARG279NH2   | 2.8082    | 158.2713 | 79.53    |
| RA28N7         |                    | SER287OG    | 2.7931    | 158.7031 | 16.74    |
| <b>Chain B</b> |                    |             |           |          |          |
| RRM            | RA14O1P            | ARG159`NH2  | 2.8561    | 151.385  | 22.63    |
|                | RA14O1P            | ARG159`NE   | 2.894     | 150.0197 | 18.04    |
|                | RA15O2P            | ARG159`NH1  | 2.8512    | 155.4294 | 44.86    |
|                | RA10N7             | GLN205`NE2  | 2.9896    | 159.9009 | 15.91    |
|                | RA12O2P            | GLN205`N    | 2.9356    | 161.6606 | 30.68    |
|                | RA12O2P            | ARG206`N    | 2.9626    | 159.1278 | 31.64    |
|                | LEU231`O           | RA16N6      | 0.2046    | 3.0624   | 20.46    |
|                | RA16O1P            | ARG235`NH1  | 2.9513    | 158.7658 | 27.4     |

|     |                |             |        |          |       |
|-----|----------------|-------------|--------|----------|-------|
|     | RA16O2P        | ARG248`NH1  | 2.8081 | 155.9463 | 49.11 |
|     | RA15O2P        | THR250`OG1  | 2.7187 | 164.6902 | 42.45 |
| CTD | RA14N7         | ARG261`NH1  | 3.0402 | 151.1058 | 18.92 |
|     | RA15O1P        | ARG261`NH1  | 2.8201 | 151.4708 | 34.15 |
|     | RA17O1P        | ARG279`NH2  | 2.8553 | 152.921  | 20    |
|     | RA17O1P        | SER281`OG   | 2.7112 | 163.9647 | 24.92 |
|     | SER281`OG      | RA18N6      | 0.662  | 3.0336   | 66.2  |
|     | RA17O2P        | TYR282`N    | 2.9233 | 162.8818 | 94.67 |
|     | RA18O1P        | LYS285`NZ   | 2.8276 | 159.2497 | 33.55 |
|     | RA19O1P        | LYS285`NZ   | 2.8205 | 157.8609 | 16.48 |
|     | <b>Chain C</b> |             |        |          |       |
| RRM | RA6O1P         | ARG210``NE  | 2.9434 | 151.5862 | 45.67 |
|     | RA6O1P         | ARG211``NE  | 2.9376 | 153.8264 | 18.64 |
|     | RA7O2P         | ARG211`NH2  | 2.8686 | 158.4255 | 26.57 |
|     | RA7O1P         | ARG211``NH1 | 2.8399 | 156.8347 | 25.34 |
| CTD | RA8O2P         | ARG261``NH1 | 2.8189 | 160.6875 | 41.28 |
|     | ARG262``O      | RA6N6       | 0.1778 | 3.0866   | 17.78 |
|     | RA1N3          | GLN301``NE2 | 3.0735 | 160.9513 | 66.65 |
|     | LYS318``O      | RA5N6       | 0.2011 | 2.9558   | 20.11 |
|     | ASN322``O      | RA1N6       | 0.2109 | 2.936    | 21.09 |
|     | RA4N3          | ASN322``ND2 | 3.1096 | 159.186  | 25.88 |
|     | RA5O1P         | ASN322``ND2 | 2.8591 | 162.0326 | 33.44 |
|     | MET323``O      | RA1N6       | 0.1987 | 2.9631   | 19.87 |



**Supplementary Figure S1.** Number of Hydrogen bonds formed between ORF1p and RNA fragments during 4 independent runs. The frames with maximum number of hydrogen bonds are indicated by arrows

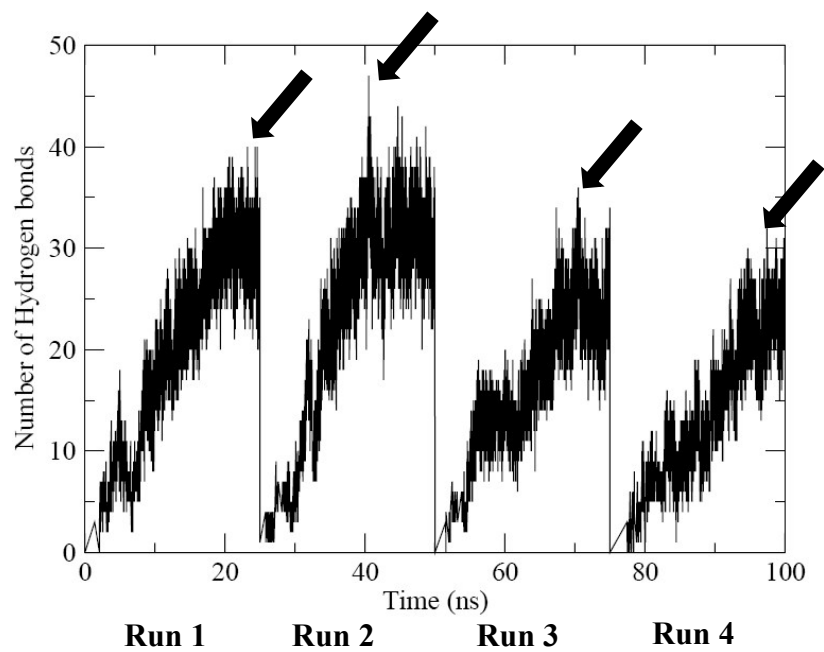

**Supplementary Figure S2.** The contact map of ORF1p-RNA complexes. The domains of ORF1p are colored as CC (cyan), RRM (Magenta), CTD (orange) and RNA (gray). The ORF1p residues are demarcated from RNA by white lines.

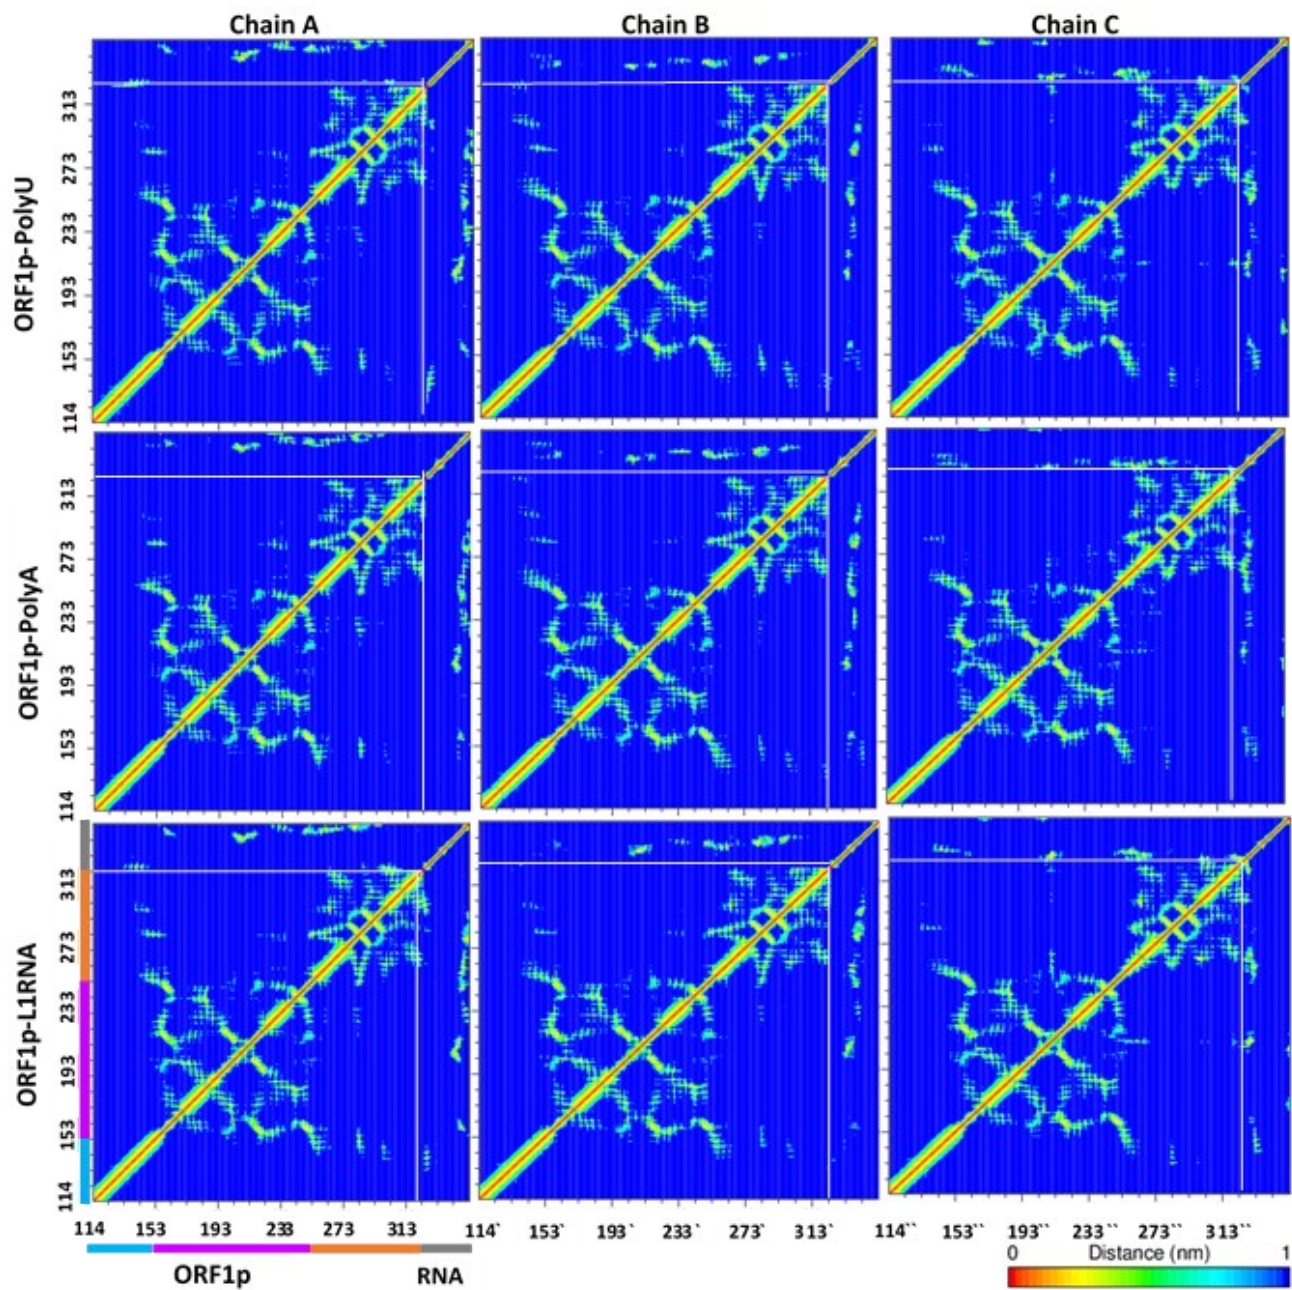

**Supplementary Figure S3:** The front and back views FEL minima structures of ORF-PolyU (a,b), ORF1-L1RNA (c,d) and ORF1p-PolyA (e,f) superimposed over the initial structure in grey. The movement/conformation of RRM loop and CTD are indicated by black color arrows. The upper part of trimeric coiled domain is cropped for the better visualization.

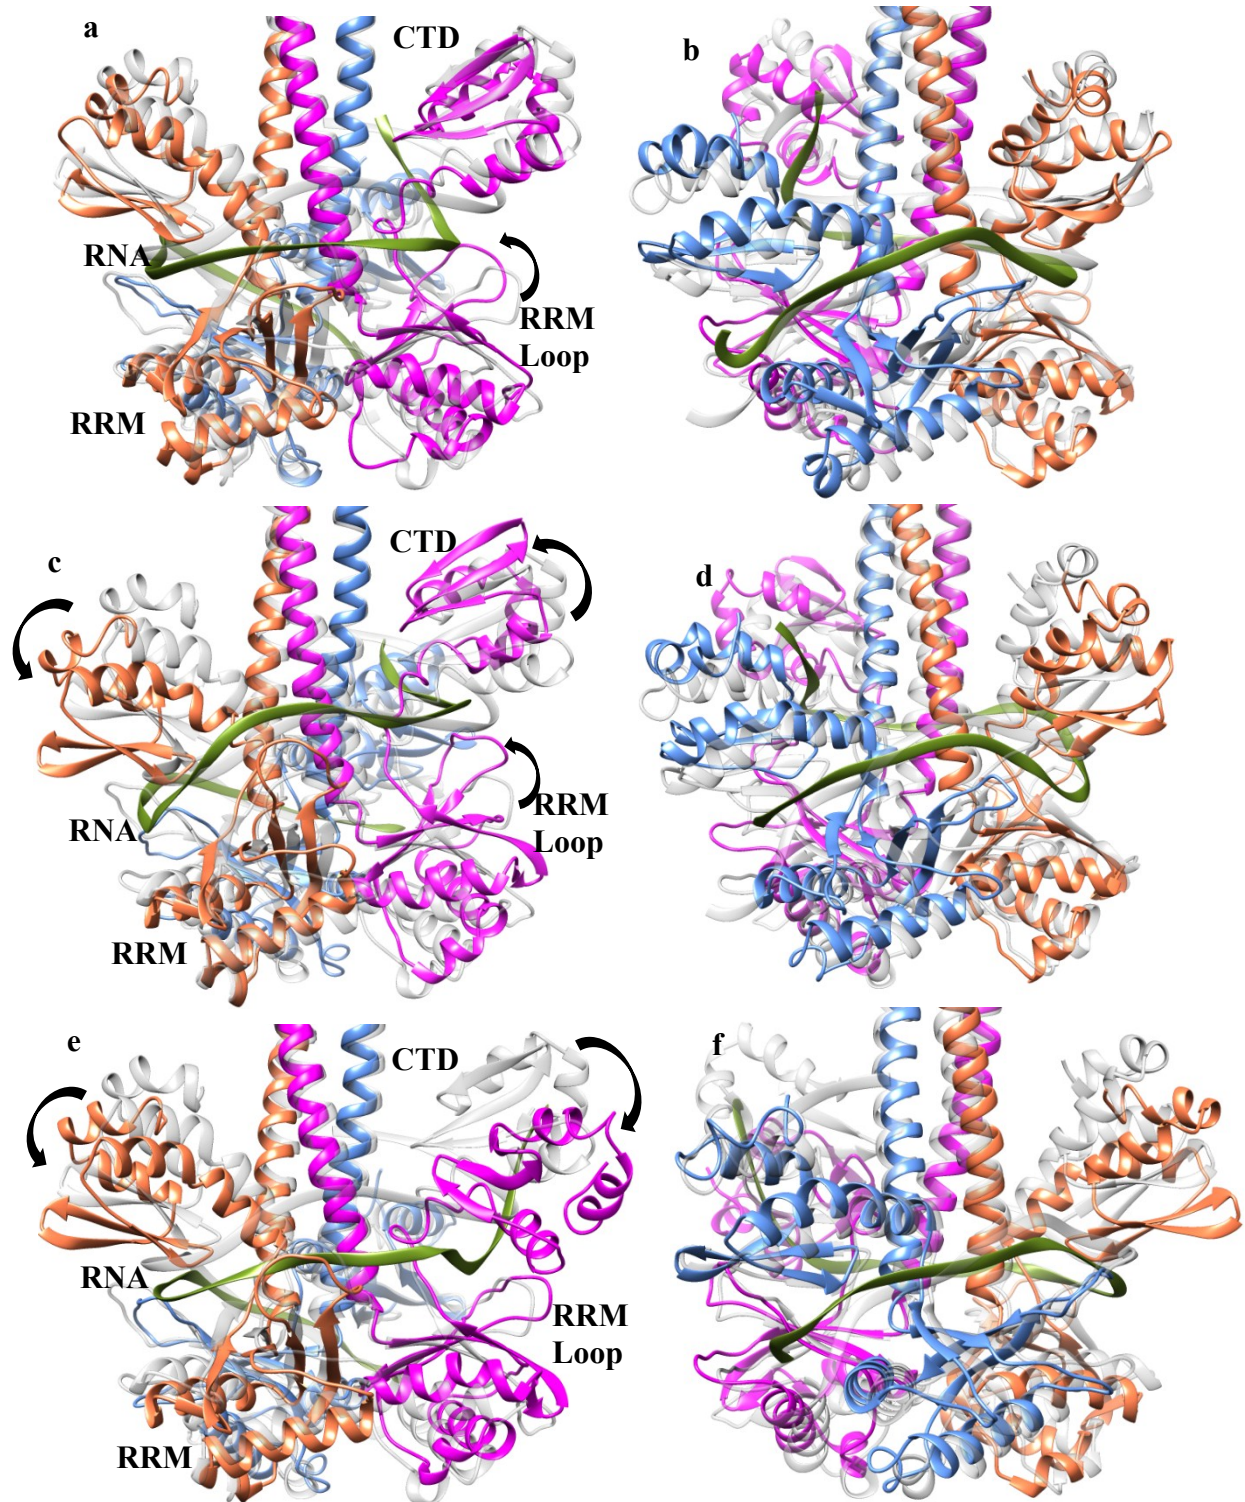

**Supplementary Figure S4.** The per-residue decomposition of ORF1-L1RNA (black), ORF1-polyU (Blue) and ORF1-polyA (red). The key differences are circled (black) and labeled respectively.

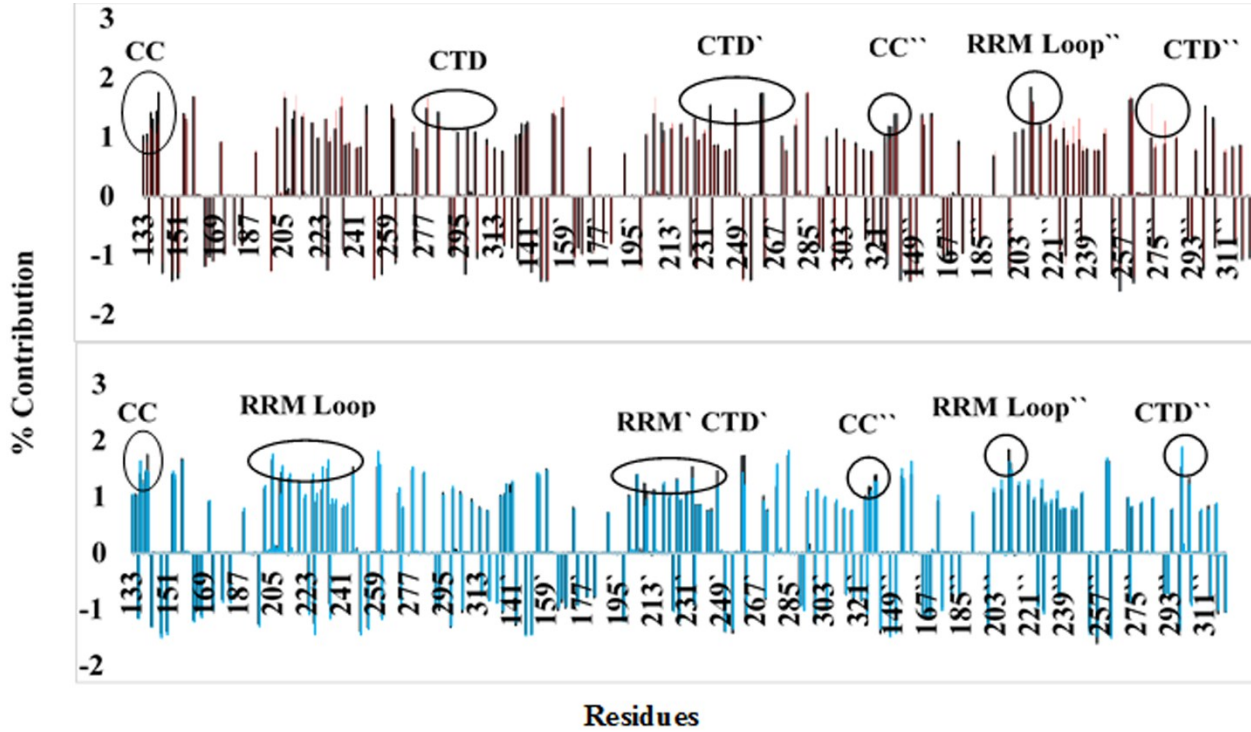

**Supplementary Figure S5.** Possible higher order assembly of ORF1p-RNA complexes. The linker RNA connecting two trimers is represented by dotted lines. The oligomerization can be extended on both sides by the assembly of trimers in a similar manner

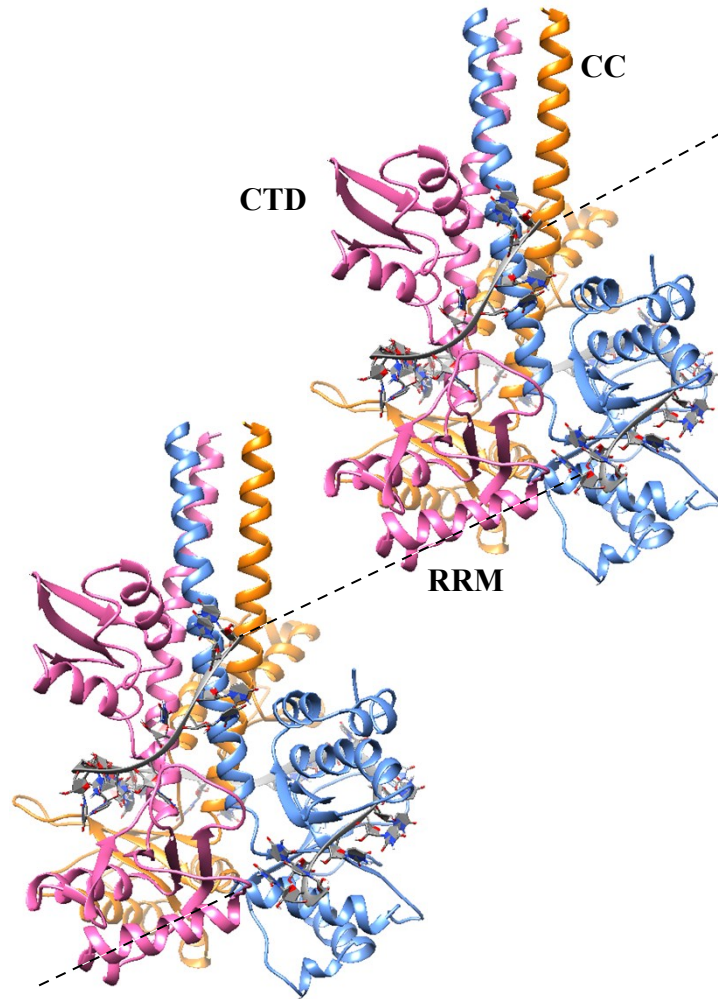

Supplement: c7mb00358g1.pdf [file c7mb00358g1.pdf]
